# Supplementary material
Source: PubMed Central journal article supplement (PMC3145824)
Supplement: NIHMS273296-supplement-1.pdf [file NIHMS273296-supplement-1.pdf]

**C**

|           | ER+   | ER- | PR+   | PR- | Her2+ | Her2- | Lymph<br>met+ | Lymph<br>met- |
|-----------|-------|-----|-------|-----|-------|-------|---------------|---------------|
| Jagged2 + | 13    | 22  | 9     | 22  | 20    | 14    | 7             | 15            |
| Jagged2 - | 16    | 19  | 20    | 21  | 23    | 14    | 1             | 45            |
|           | P>0.9 |     | P>0.5 |     | P>0.9 |       | P=0.01        |               |

**D**

|           | ER+   | ER- |
|-----------|-------|-----|
| Jagged2 + | 30    | 20  |
| Jagged2 - | 104   | 44  |
|           | P>0.7 |     |

**Supplemental Fig. 1**
