# Supplementary material
Source: PubMed Central journal article supplement (PMC3145824)
Supplement: NIHMS273296-supplement-3.pdf [file NIHMS273296-supplement-3.pdf]

**A****MDA-MB231**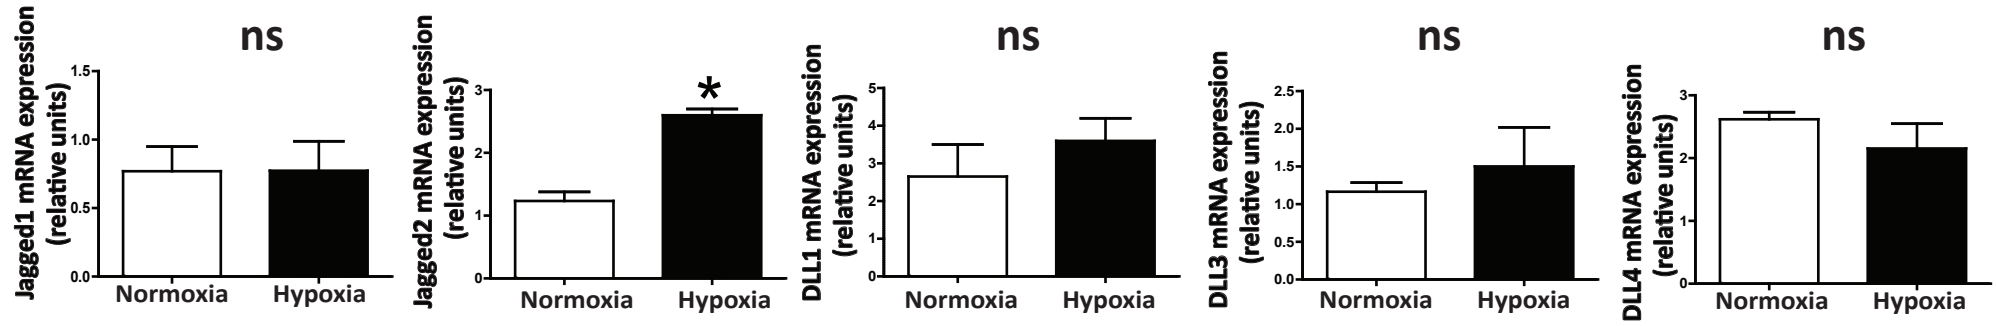**B****MCF7**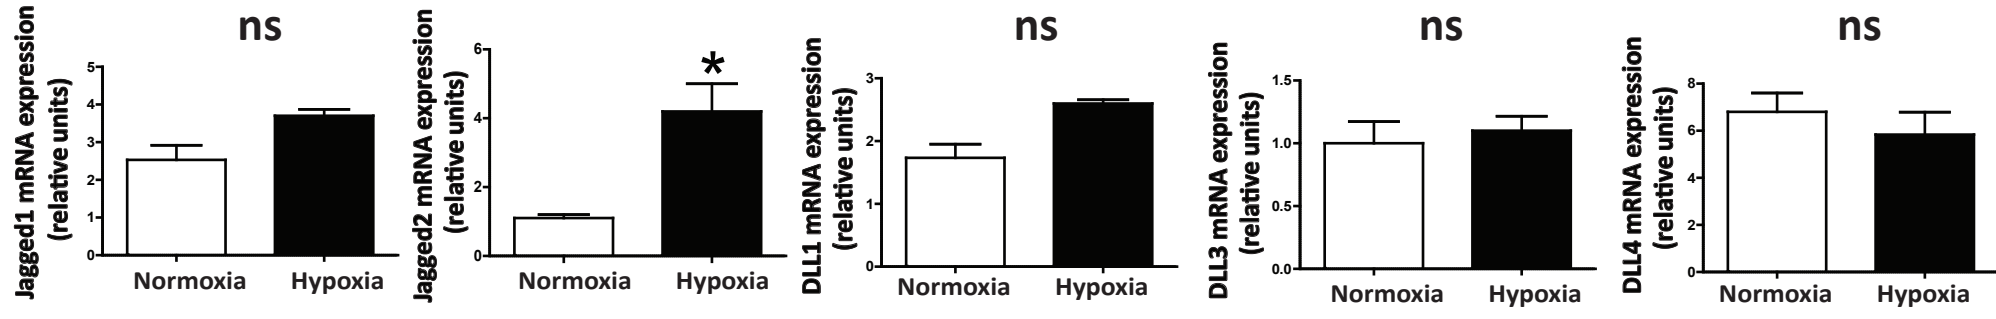

Supplemental Fig. 3
