# Supplementary material
Source: PubMed Central journal article supplement (PMC3145824)
Supplement: NIHMS273296-supplement-4.pdf [file NIHMS273296-supplement-4.pdf]

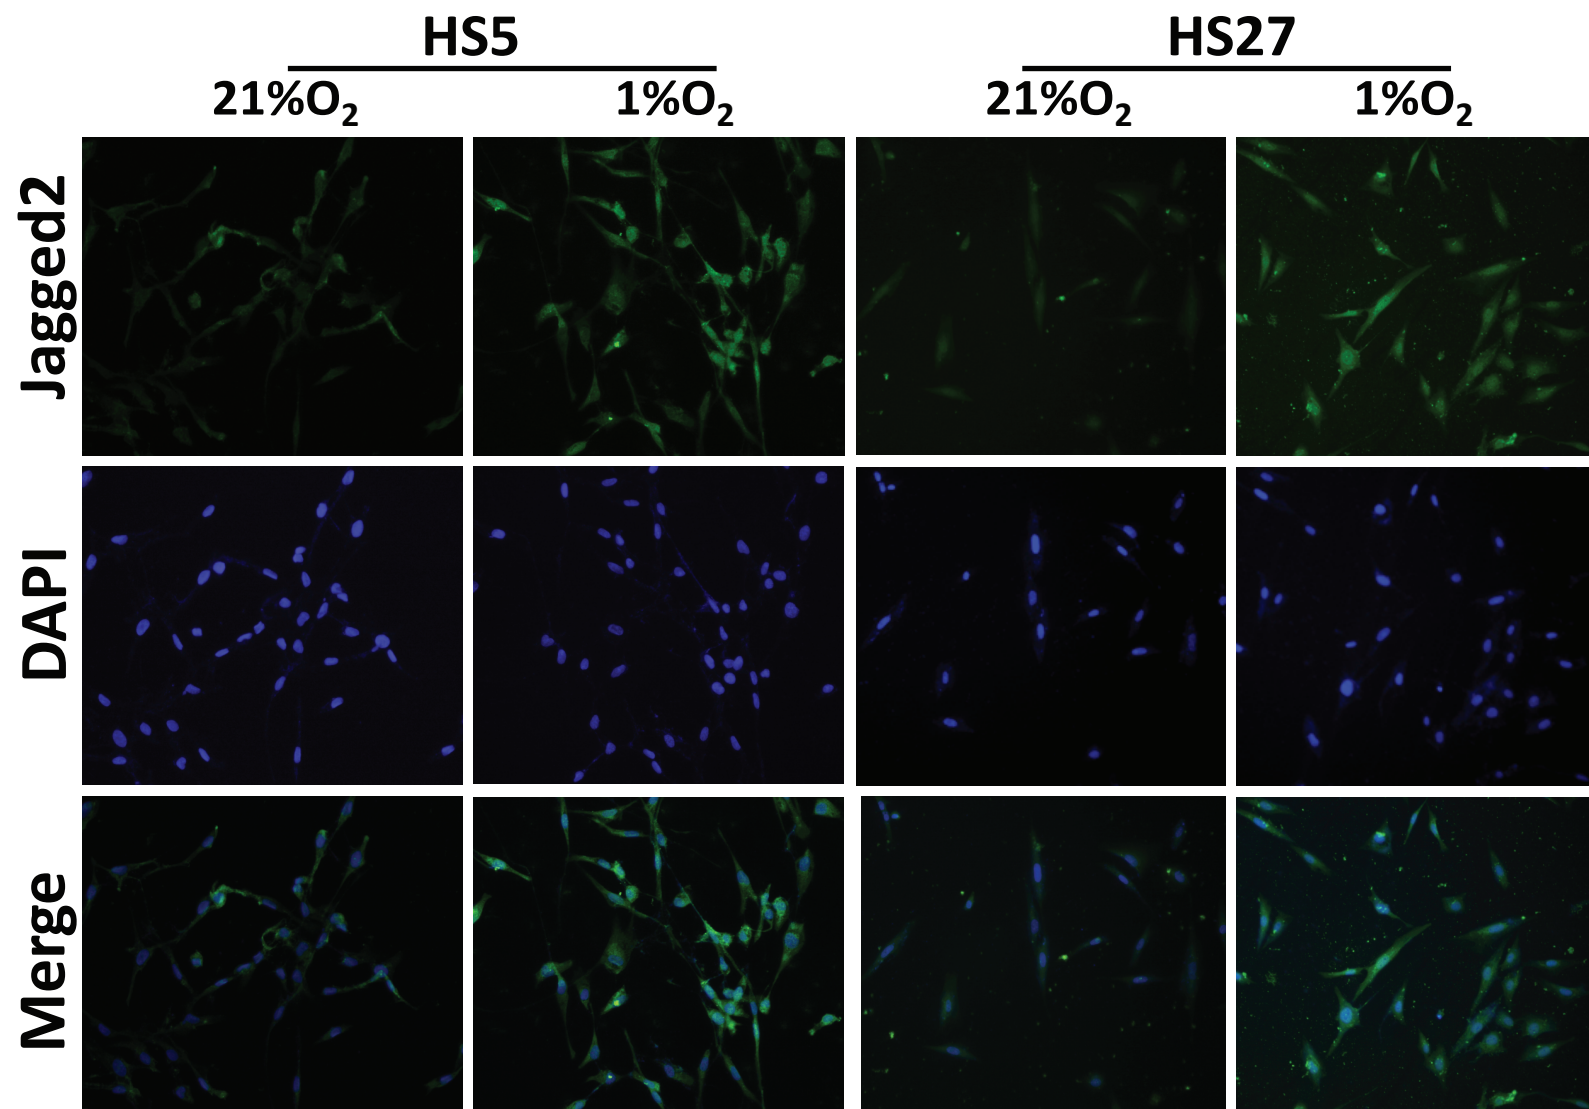

Supplemental Fig. 4
