# Supplementary material
Source: PubMed Central journal article supplement (PMC3145824)

**A****Cancer stem-like cells (CD24<sup>-</sup>,CD44<sup>+</sup>,ESA<sup>+</sup>)**

| Cell#           | Tumor incidence | Cell#           | Tumor incidence |
|-----------------|-----------------|-----------------|-----------------|
| BoM NSC         |                 | BoM SC          |                 |
| 10              | 0/4             | 10              | 0/5             |
| 10 <sup>2</sup> | 0/4             | 10 <sup>2</sup> | 9/11            |
| 10 <sup>3</sup> | 2/4             | 10 <sup>3</sup> | 11/11           |

**B**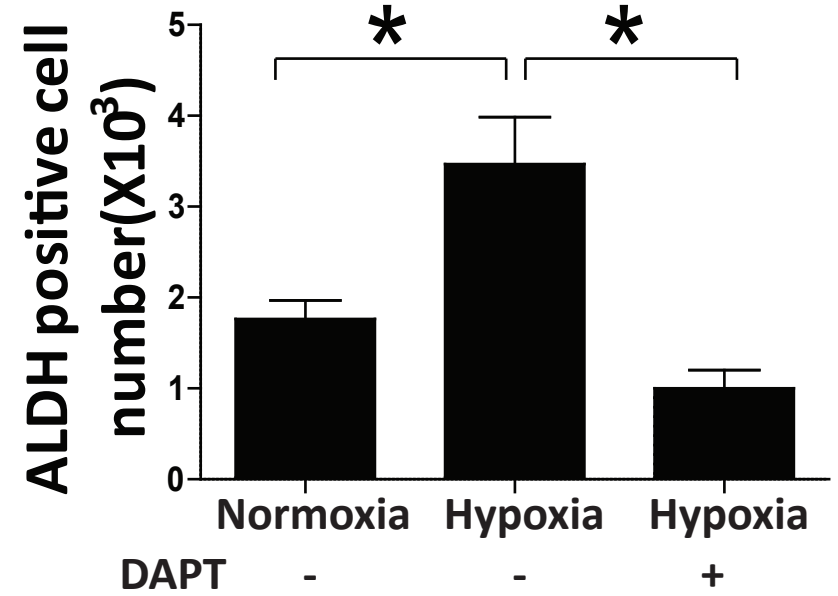**C**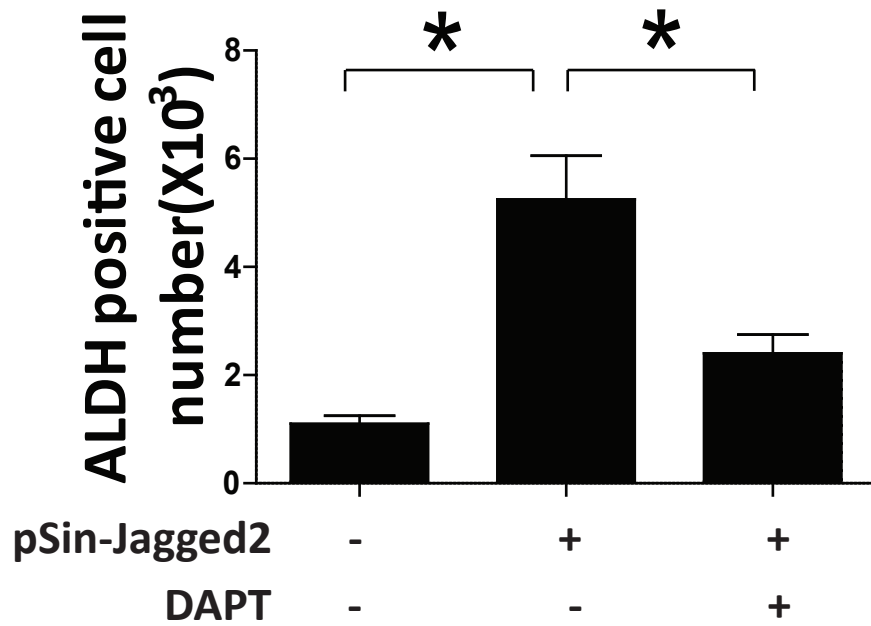

Supplement: NIHMS273296-supplement-5.pdf [file NIHMS273296-supplement-5.pdf]
